# Supplementary material for: Kinetic Investigation of the Oxidative Thermal Decomposition of Levonorgestrel
Source: MDPI journal article supplement (doi:10.3390/pr11113210), 2023-11-10
Supplement: s1 [file s1]

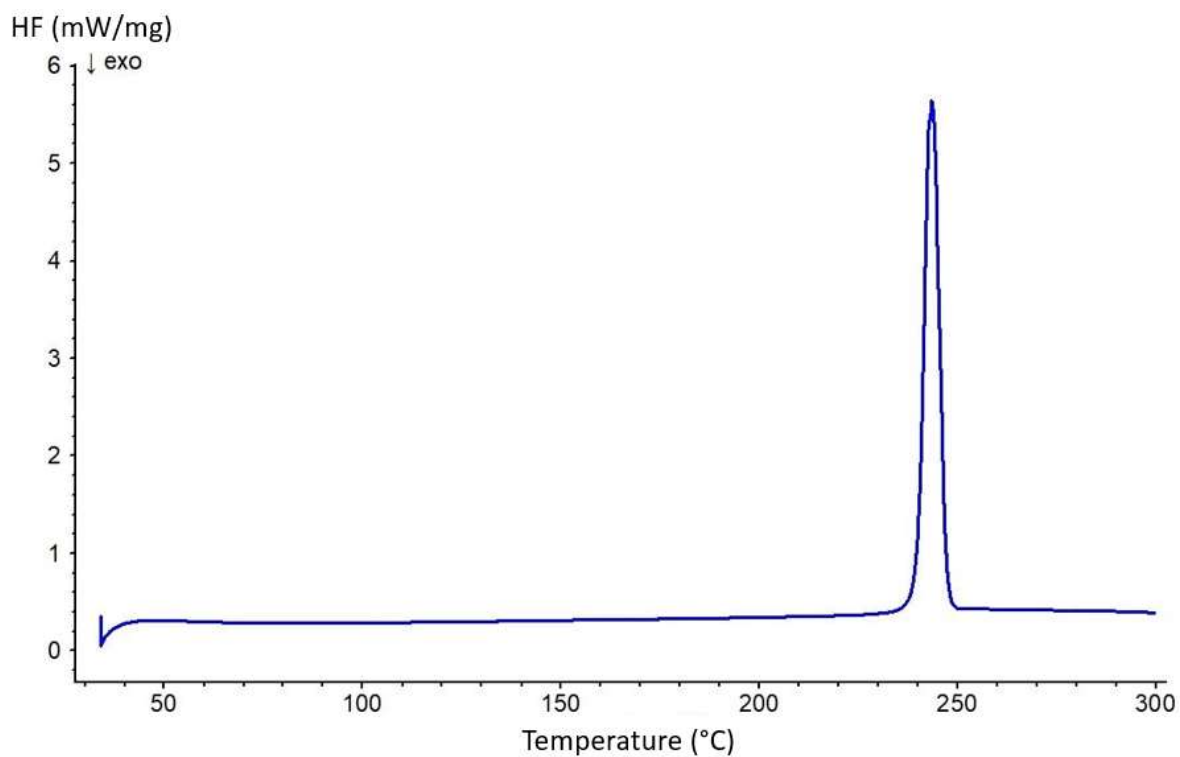

**Figure S1.** The DSC curve recorded for LNG at  $\beta = 10\text{ }^{\circ}\text{C}\cdot\text{min}^{-1}$  on 30-300°C temperature range

---

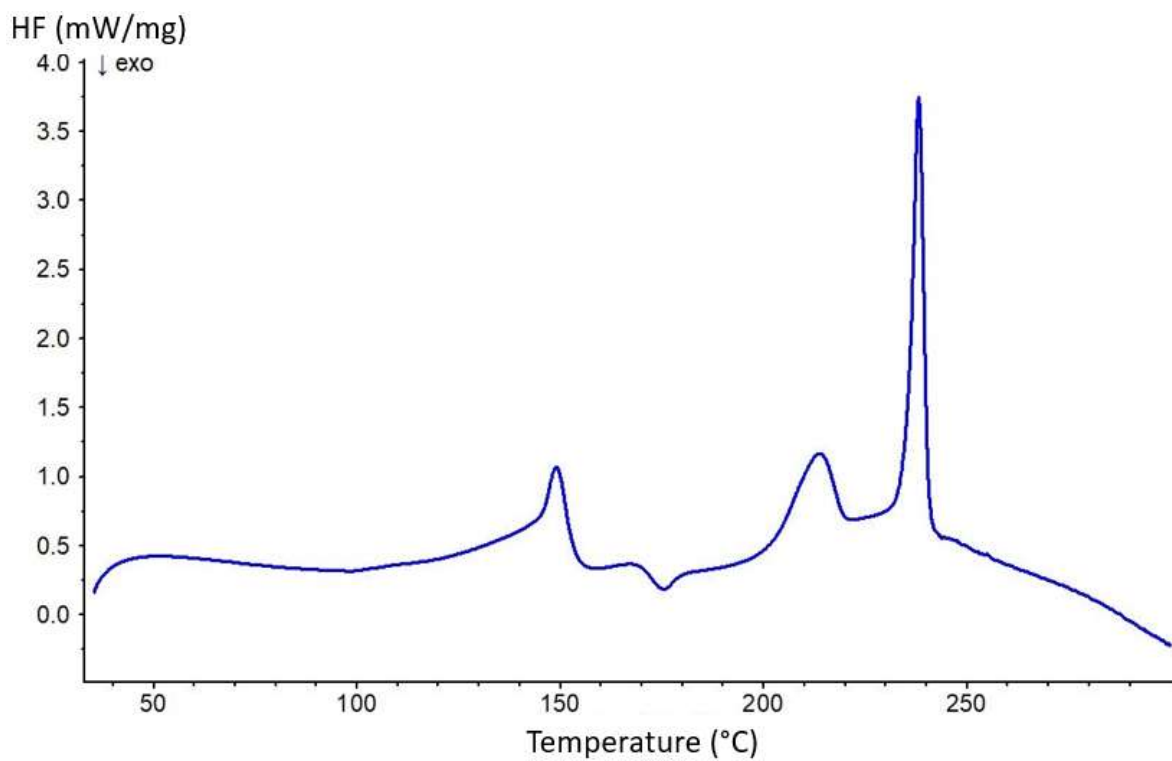

**Figure S2.** The DSC curve recorded for LNGMIX at  $\beta = 10\text{ }^{\circ}\text{C}\cdot\text{min}^{-1}$  on 30-300 °C temperature range

---

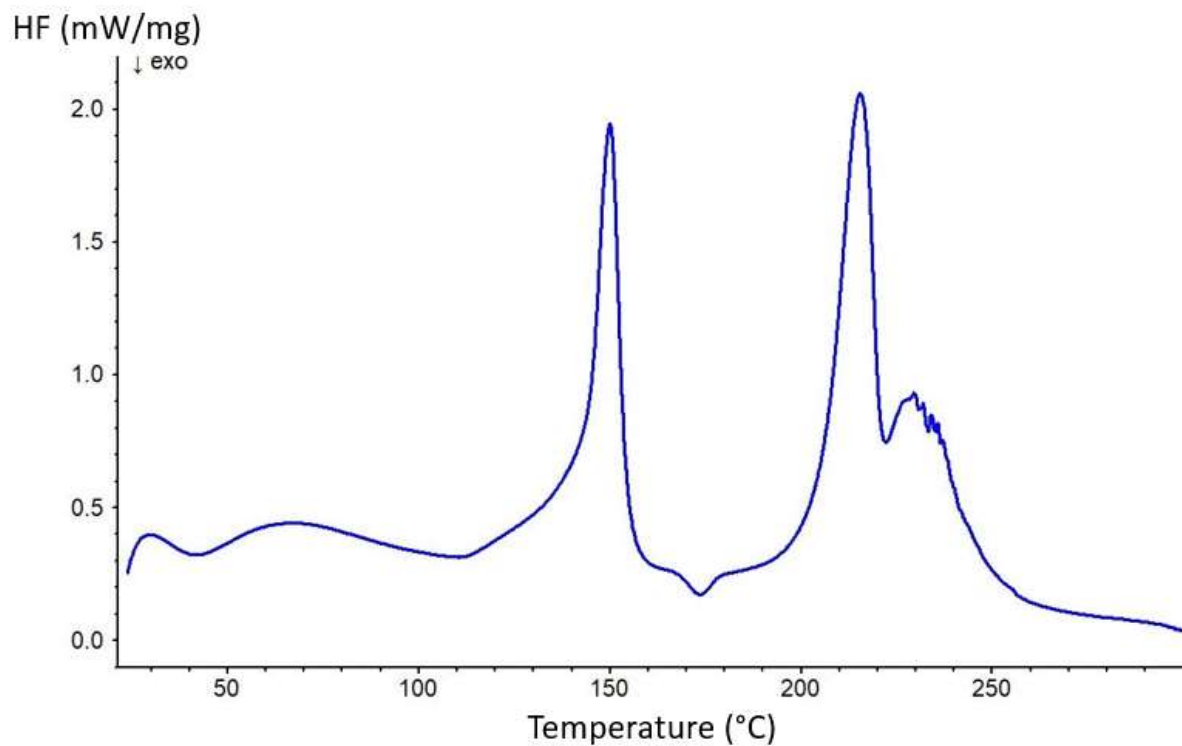

**Figure S3.** The DSC curve recorded for LNGTHAB at  $\beta = 10\text{ }^{\circ}\text{C}\cdot\text{min}^{-1}$  on 30-300  $^{\circ}\text{C}$  temperature range

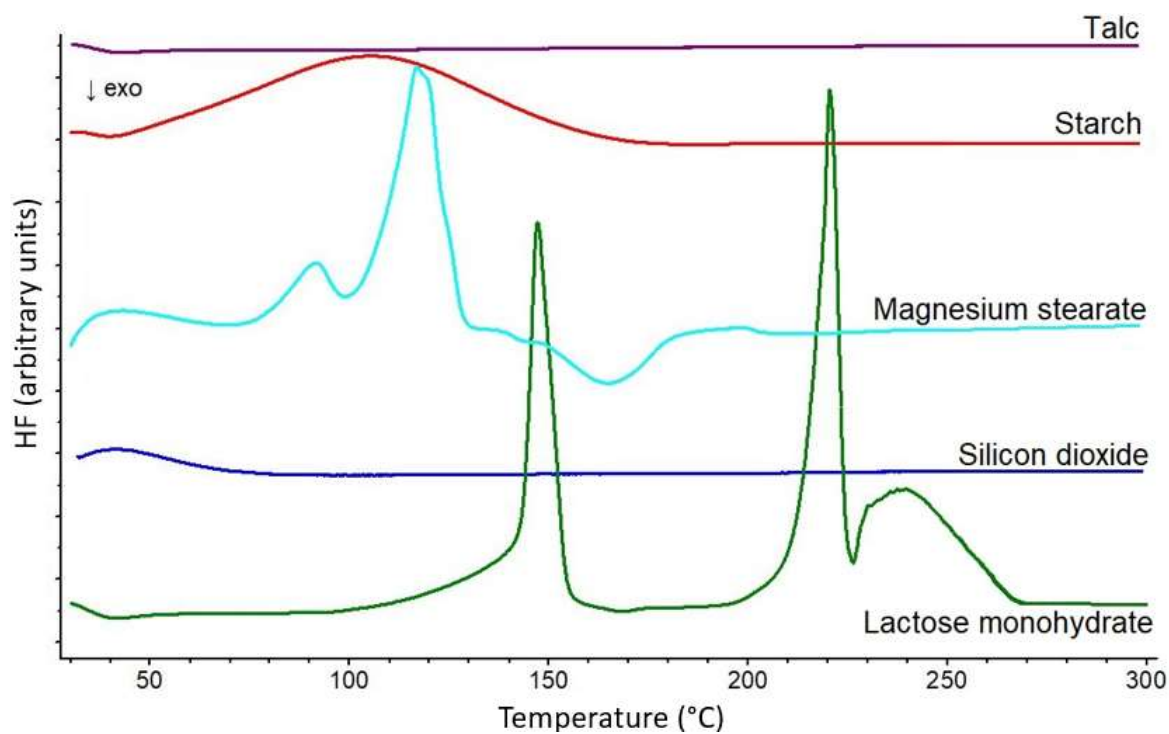

**Figure S4.** The DSC curve recorded for the excipients present in the pharmaceutical formulation in dynamic air atmosphere at  $\beta = 10\text{ }^{\circ}\text{C}\cdot\text{min}^{-1}$ .

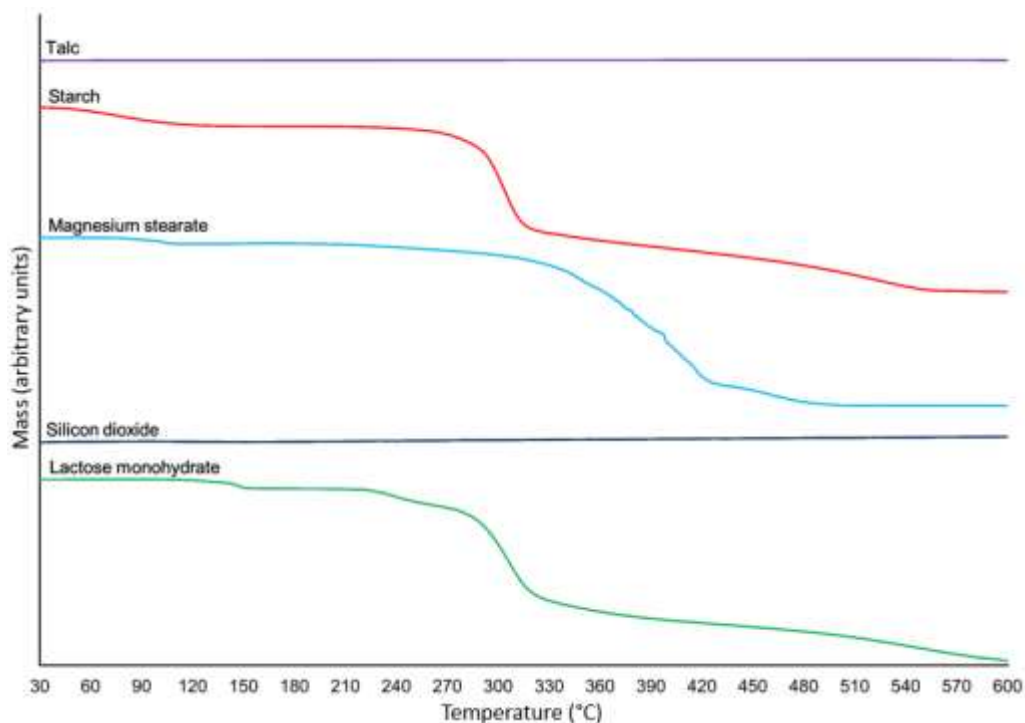

**Figure S5.** Thermoanalytical data (TG) recorded for the excipients present in the pharmaceutical formulation in dynamic air atmosphere at  $\beta = 10\text{ }^{\circ}\text{C}\cdot\text{min}^{-1}$ .

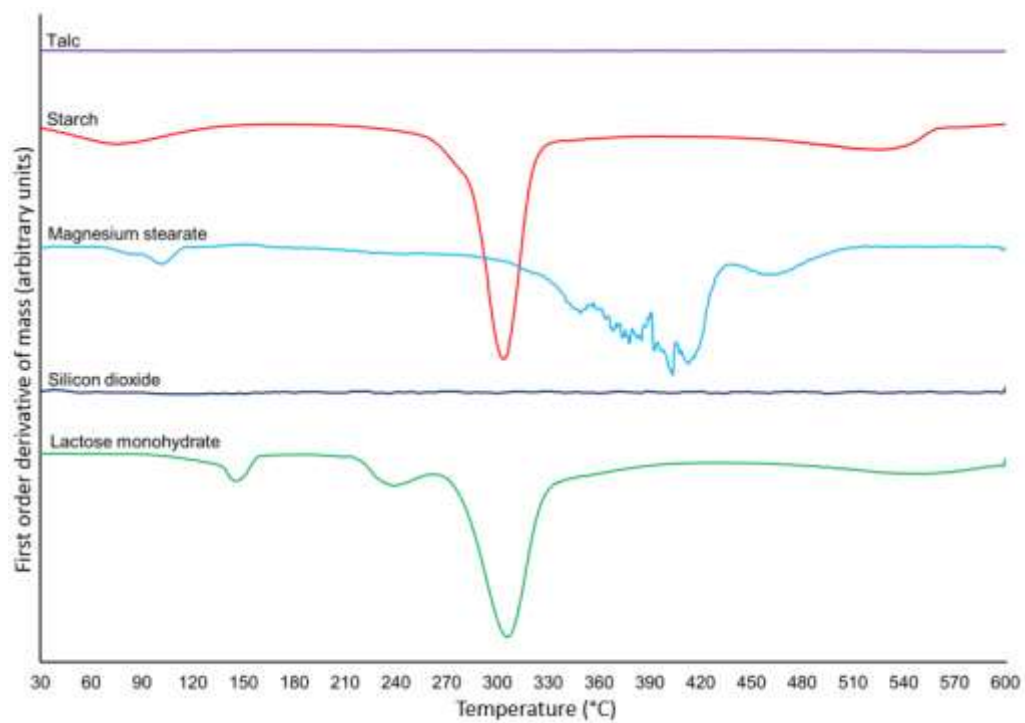

**Figure S6.** Thermoanalytical data (DTG) recorded for the excipients present in the pharmaceutical formulation in dynamic air atmosphere at  $\beta = 10\text{ }^{\circ}\text{C}\cdot\text{min}^{-1}$ .

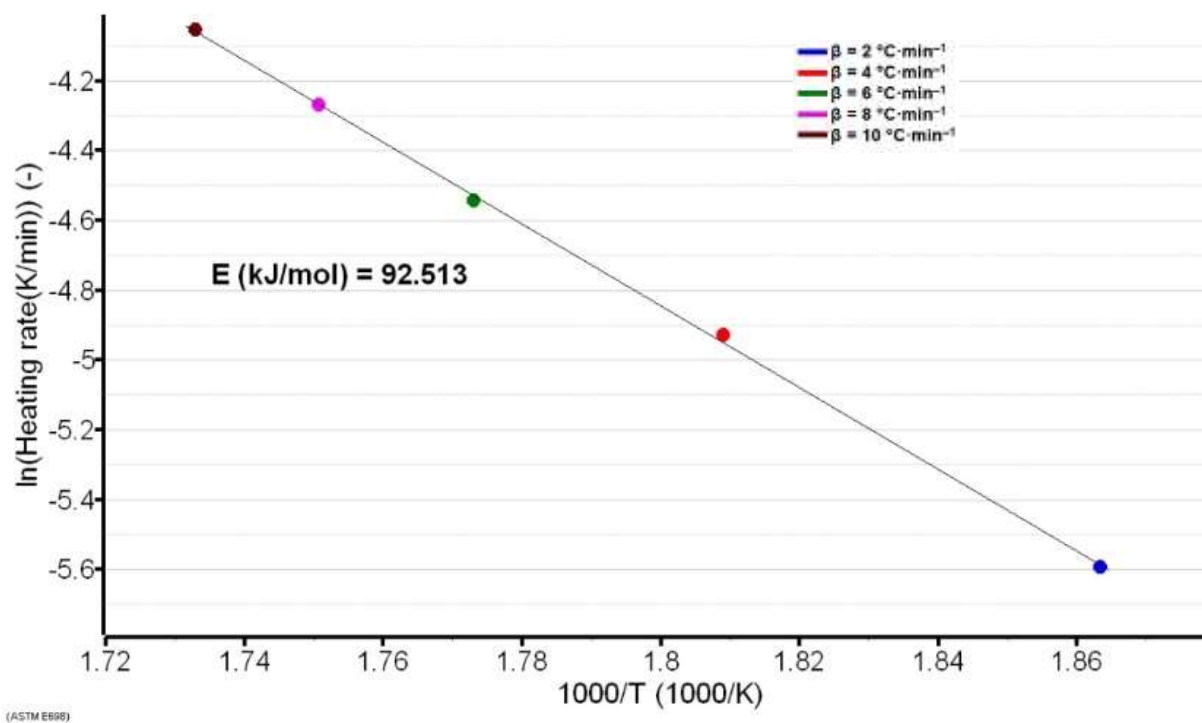

(a)

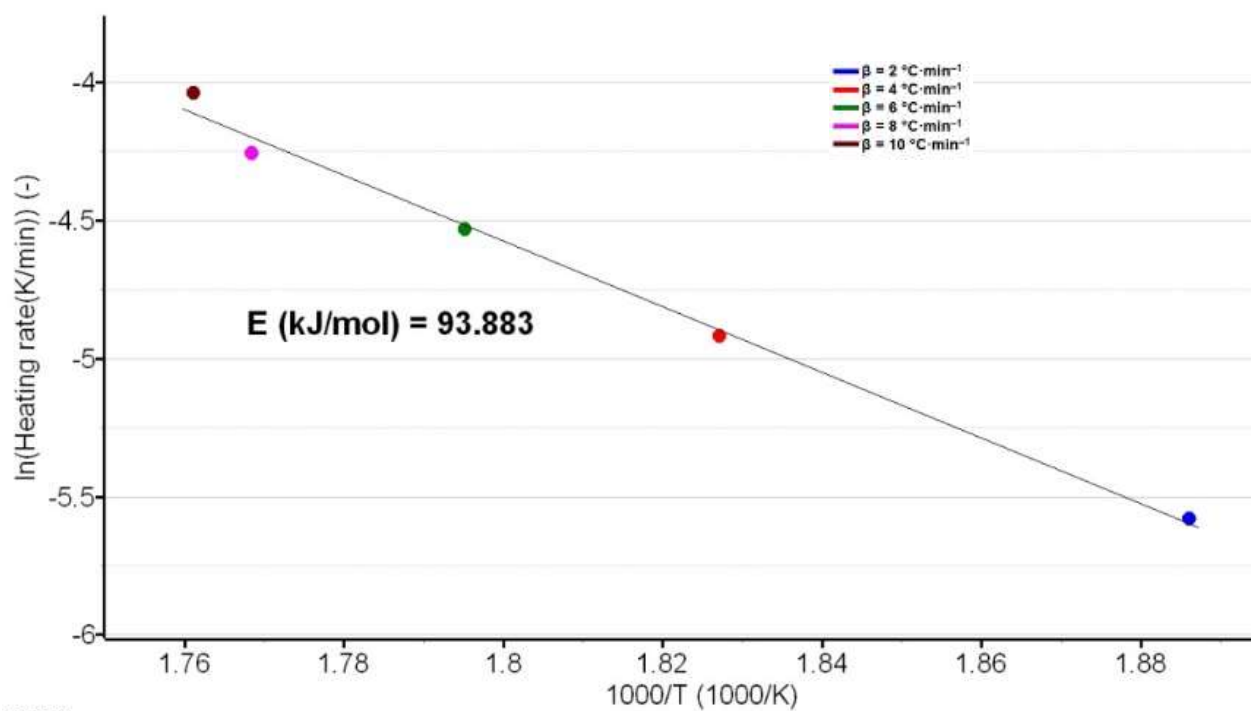

(b)

**Figure S7.** The plot according to the ASTM E698 kinetic method with the estimated activation energy of “process 1” for: (a) LNG and (b) LNGMIX

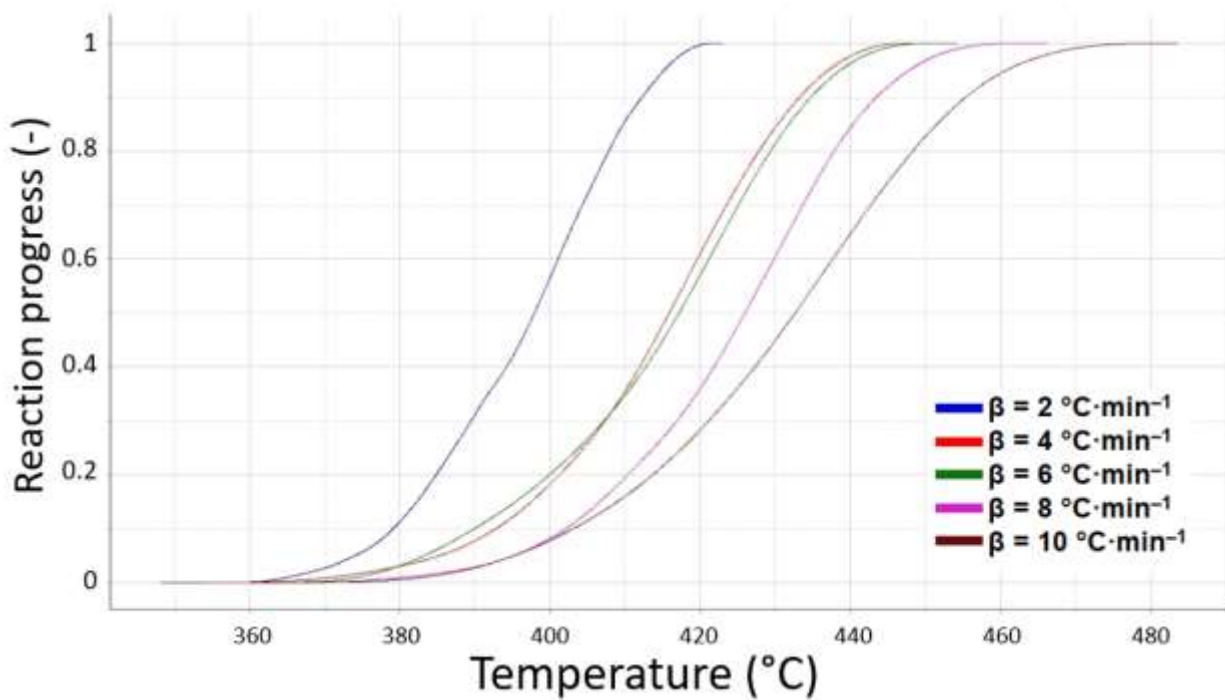

(a)

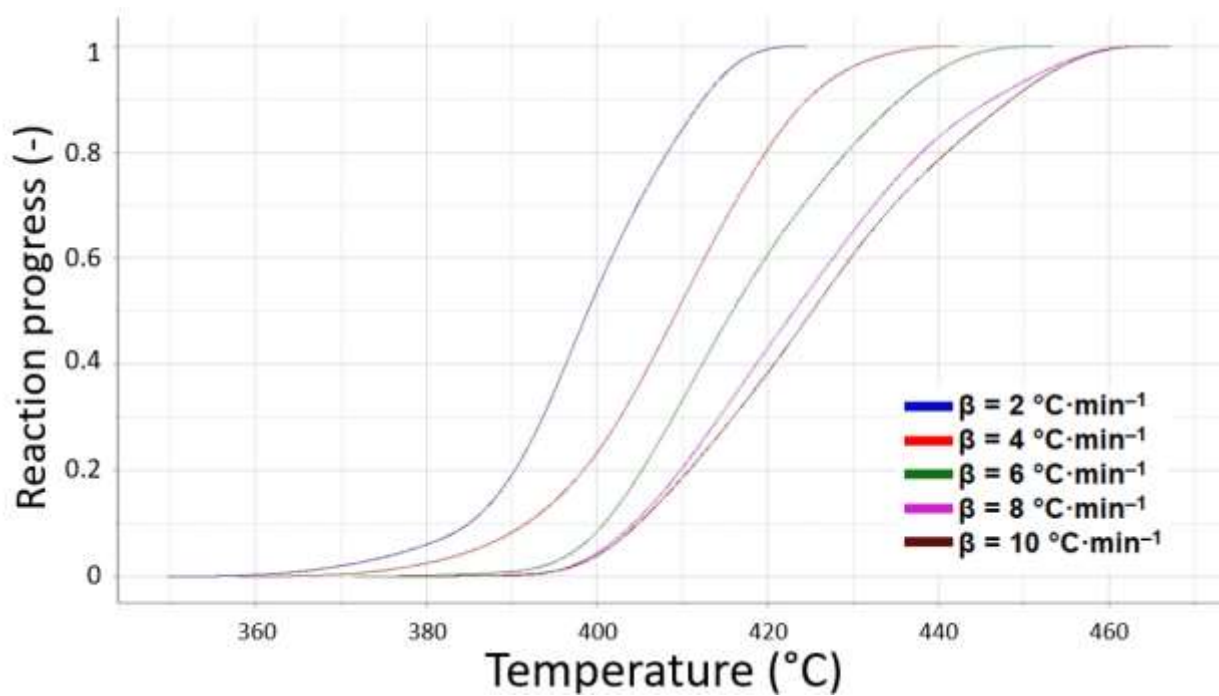

(b)

**Figure S8.** The reaction progress *vs.* temperature for “process 2” at selected heating rates for: (a) LNG and (b) LNGMIX

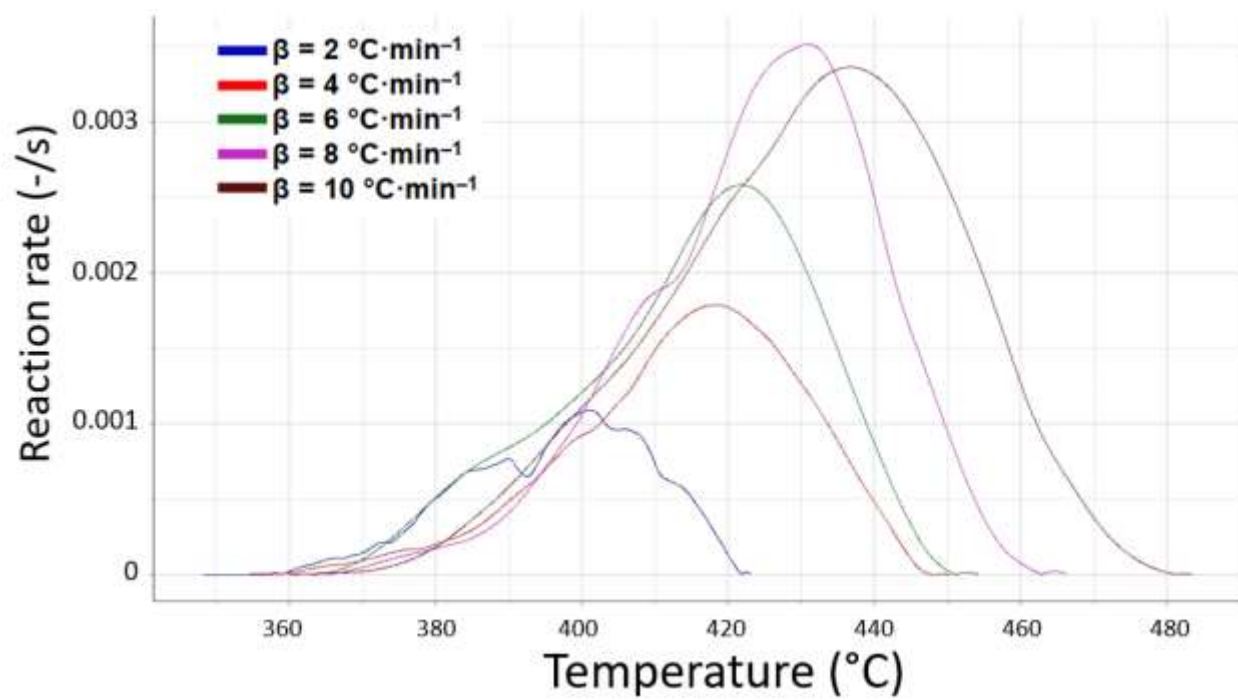

(a)

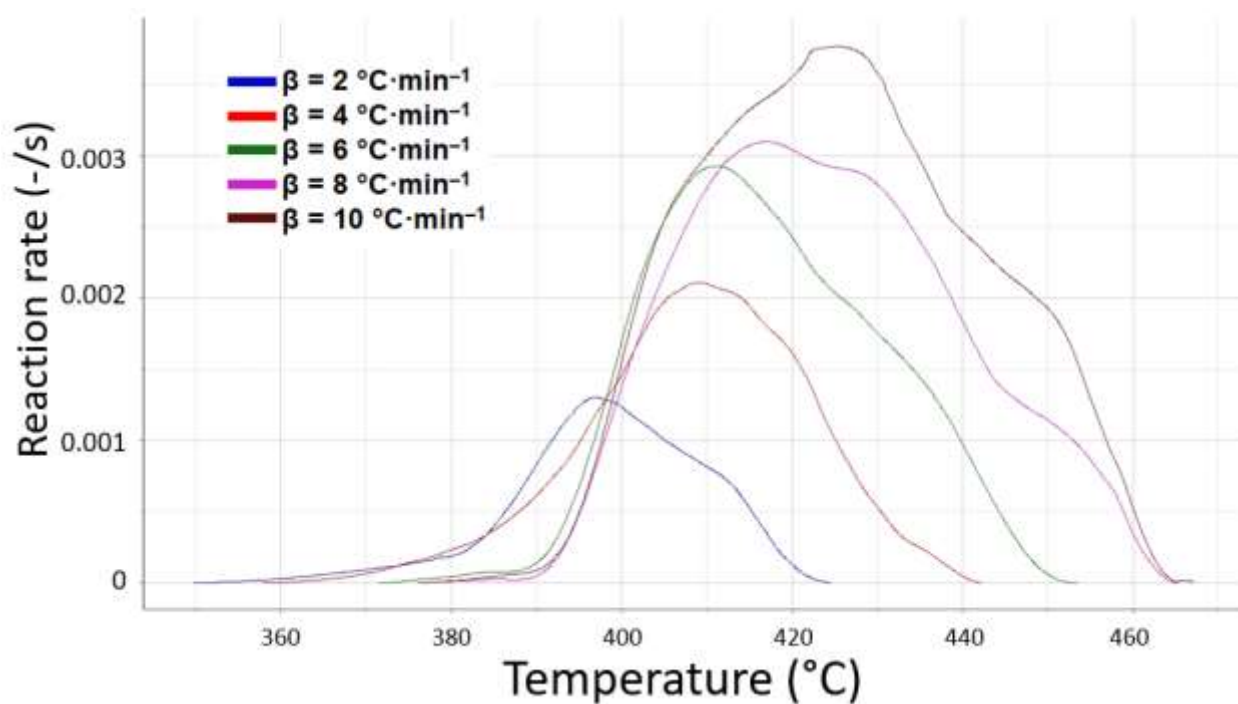

(b)

**Figure S9.** The reaction rate *vs.* temperature for “process 2” at selected heating rates for: (a) LNG and (b) LNGMIX

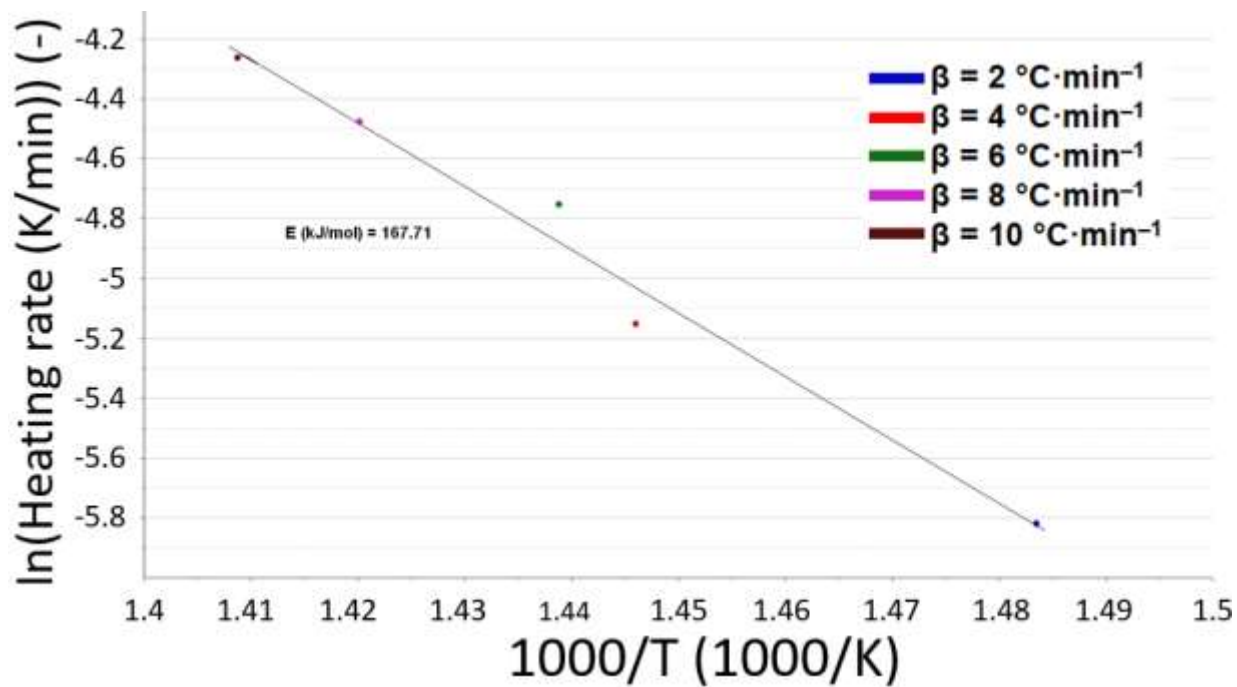

(a)

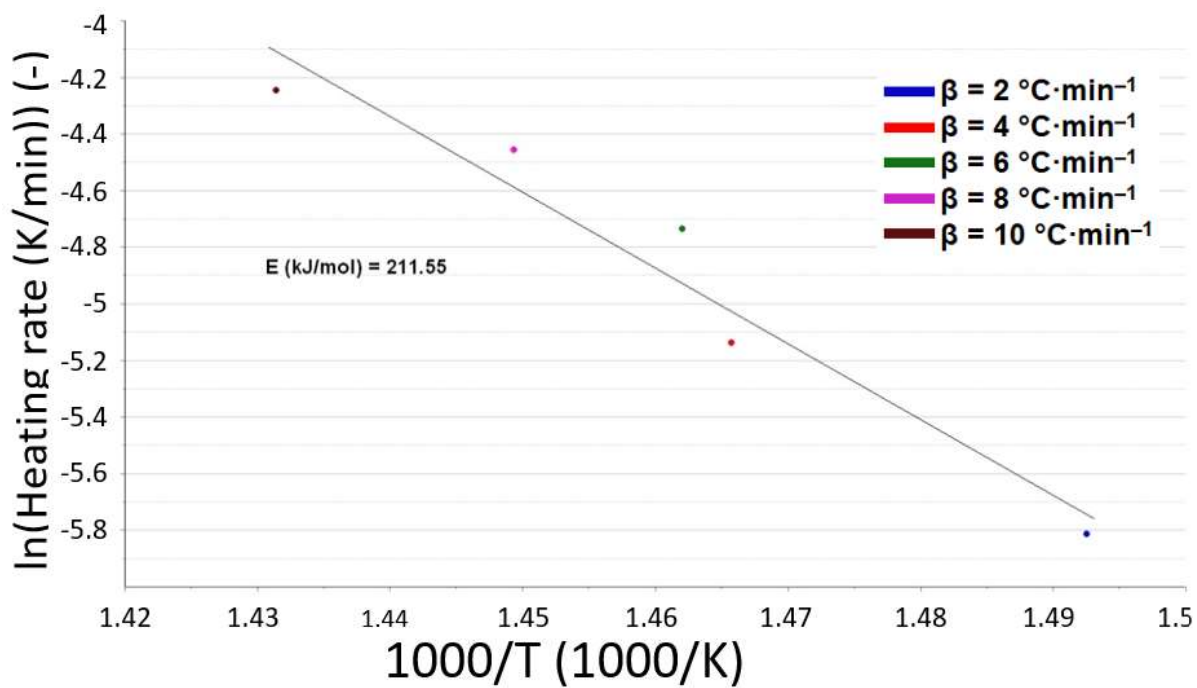

(b)

**Figure S10.** The plot according to the ASTM E698 kinetic method with the estimated activation energy of “process 2” for: (a) LNG and (b) LNGMIX

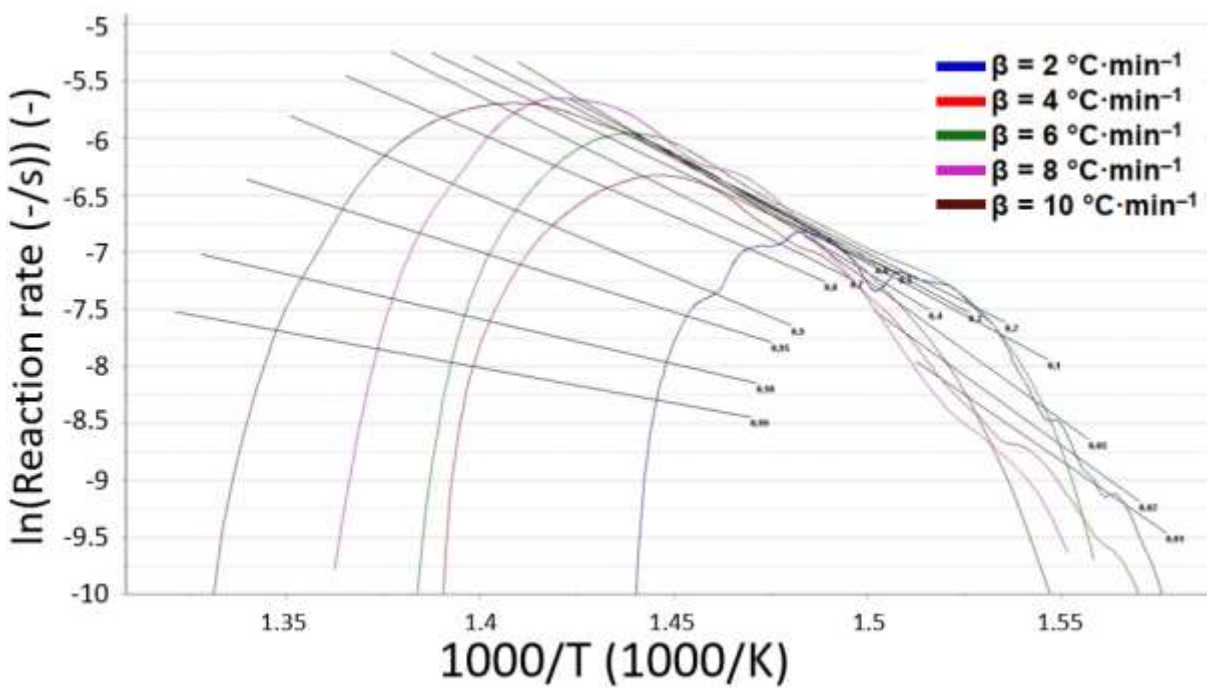

(a)

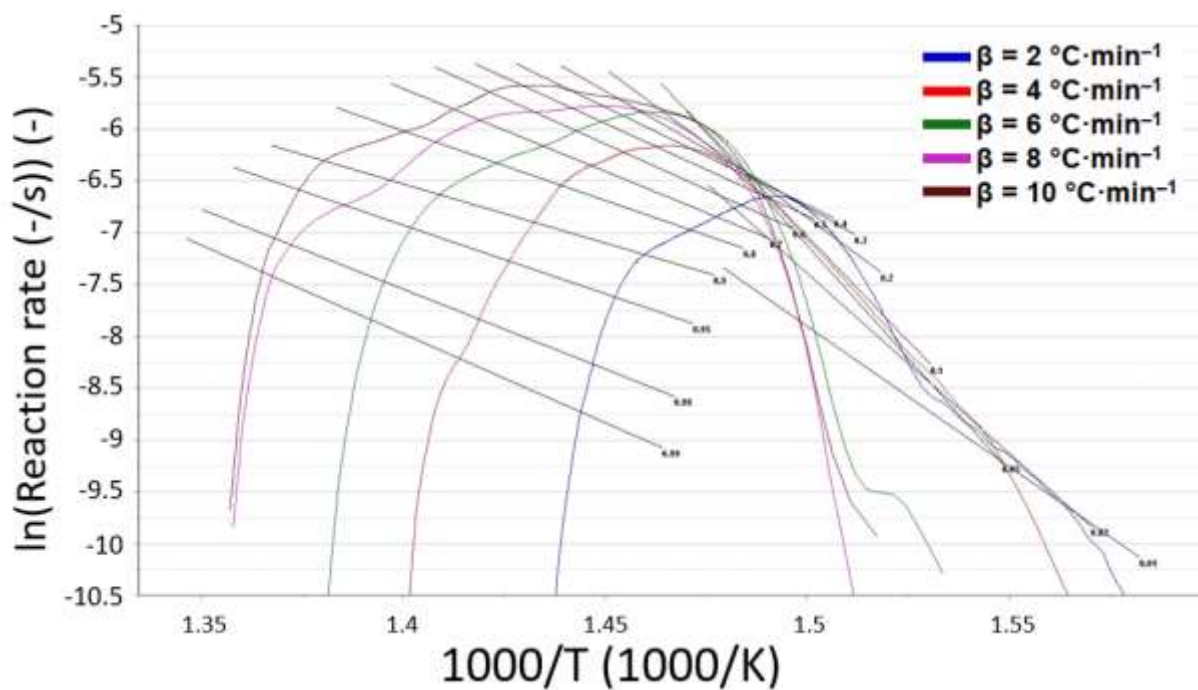

(b)

**Figure S11.** Linear plotting of FR differential isoconversional method of the analyzed “process 2” of decomposition for: (a) LNG and (b) LNGMIX

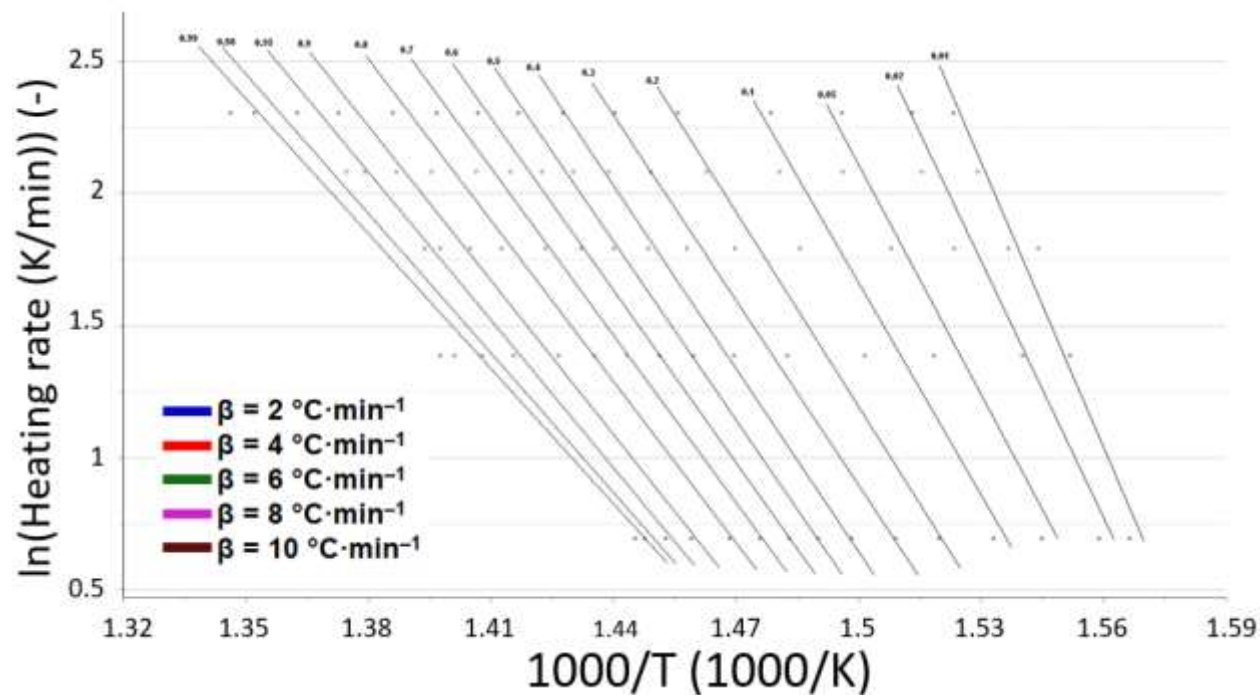

(a)

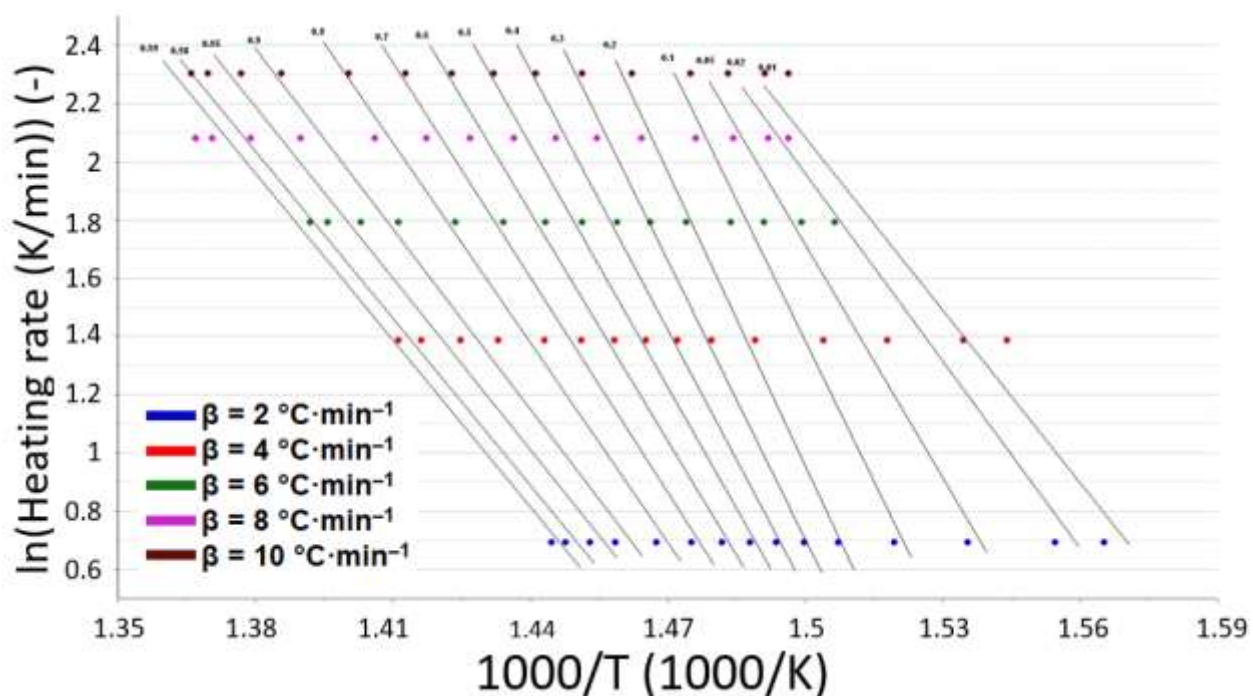

(b)

**Figure S12.** Linear plot of FWO integral isoconversional method of the analyzed "process 2" of decomposition process for: (a) LNG and (b) LNGMIX

**Table S1.** Variation of  $E_a$  vs.  $\alpha$  for both samples LNG and LNGMIX for “process 2” using the FR and FWO isoconversional methods

| $\alpha$                           | Variation of $E_a$ (kJ·mol <sup>-1</sup> ) vs. $\alpha$ for |           |            |           |
|------------------------------------|-------------------------------------------------------------|-----------|------------|-----------|
|                                    | LNG                                                         |           | LNGMIX     |           |
|                                    | FR                                                          | FWO       | FR         | FWO       |
| <b>0.05</b>                        | 203.5                                                       | 228.5     | 361.3      | 211.1     |
| <b>0.1</b>                         | 151.3                                                       | 211.9     | 338.0      | 254.4     |
| <b>0.15</b>                        | 146.6                                                       | 202.1     | 280.9      | 266.2     |
| <b>0.2</b>                         | 141.3                                                       | 194.4     | 239.3      | 265.5     |
| <b>0.25</b>                        | 146.9                                                       | 188.4     | 210.4      | 259.9     |
| <b>0.3</b>                         | 151.0                                                       | 184.4     | 186.5      | 252.3     |
| <b>0.35</b>                        | 174.9                                                       | 182.2     | 168.1      | 243.7     |
| <b>0.4</b>                         | 170.4                                                       | 182.3     | 157.1      | 235.0     |
| <b>0.45</b>                        | 154.1                                                       | 180.5     | 152.7      | 227.0     |
| <b>0.5</b>                         | 144.7                                                       | 177.9     | 147.9      | 219.6     |
| <b>0.55</b>                        | 139.2                                                       | 175.0     | 146.9      | 212.8     |
| <b>0.6</b>                         | 134.7                                                       | 172.1     | 145.7      | 206.7     |
| <b>0.65</b>                        | 136.2                                                       | 169.2     | 139.5      | 200.8     |
| <b>0.7</b>                         | 139.1                                                       | 166.7     | 133.2      | 194.7     |
| <b>0.75</b>                        | 130.4                                                       | 164.1     | 122.0      | 188.1     |
| <b>0.8</b>                         | 121.8                                                       | 160.9     | 111.5      | 180.7     |
| <b>0.85</b>                        | 122.5                                                       | 157.3     | 99.5       | 172.4     |
| <b>0.9</b>                         | 118.5                                                       | 153.9     | 94.6       | 163.1     |
| <b>0.95</b>                        | 87.8                                                        | 147.5     | 109.6      | 154.8     |
| $\bar{E}_a$ / kJ·mol <sup>-1</sup> | 142.9±5.6                                                   | 178.9±4.7 | 176.0±17.7 | 216.2±8.1 |
